# Supplementary material
Source: ML conference proceedings conference paper supplement (https://openreview.net/forum?id=kBfPB0i98K)
Supplement: supplementary_material [file attachment]

# Dual-Optimized Adaptive Graph Reconstruction for Multi-View Graph Clustering

Zichen Wen\*

School of Computer Science and  
Engineering, University of Electronic  
Science and Technology of China  
Chengdu, China  
zichen.wen@outlook.com

Tianyi Wu\*

School of Computer Science and  
Engineering, University of Electronic  
Science and Technology of China  
Chengdu, China  
tianyi-wu@outlook.com

Yazhou Ren<sup>†</sup>

School of Computer Science and  
Engineering, University of Electronic  
Science and Technology of China  
Chengdu, China  
yazhou.ren@uestc.edu.cn

Yawen Ling

School of Computer Science and  
Engineering, University of Electronic  
Science and Technology of China  
Chengdu, China  
yawen.Ling@outlook.com

Chenhang Cui

School of Computer Science and  
Engineering, University of Electronic  
Science and Technology of China  
Chengdu, China  
chenhangcui@gmail.com

Xiaorong Pu

School of Computer Science and  
Engineering, University of Electronic  
Science and Technology of China  
Chengdu, China  
puxiaor@uestc.edu.cn

Lifang He

Department of Computer Science and  
Engineering, Lehigh University  
Bethlehem, PA, USA  
lih319@lehigh.edu

## Abstract

Multi-view clustering is an important machine learning task for multi-media data, encompassing various domains such as images, videos, and texts. Moreover, with the growing abundance of graph data, the significance of multi-view graph clustering (MVGC) has become evident. Most existing methods focus on graph neural networks (GNNs) to extract information from both graph structure and feature data to learn distinguishable node representations. However, traditional GNNs are designed with the assumption of homophilous graphs, making them unsuitable for widely prevalent heterophilous graphs. Several techniques have been introduced to enhance GNNs for heterophilous graphs. While these methods partially mitigate the heterophilous graph issue, they often neglect the advantages of traditional GNNs, such as their simplicity, interpretability, and efficiency. In this paper, we propose a novel multi-view graph clustering method based on dual-optimized adaptive graph reconstruction, named DOAGC. It mainly aims to reconstruct the graph structure adapted to traditional GNNs to deal with heterophilous graph issues while maintaining the advantages of traditional GNNs. Specifically, we first develop an adaptive graph reconstruction mechanism that

accounts for node correlation and original structural information. To further optimize the reconstruction graph, we design a dual optimization strategy and demonstrate the feasibility of our optimization strategy through mutual information theory. Numerous experiments demonstrate that DOAGC effectively mitigates the heterophilous graph problem.

## CCS Concepts

• **Mathematics of computing** → **Cluster analysis**; • **Theory of computation** → **Unsupervised learning and clustering**.

## Keywords

Multi-View Graph Clustering, Homophily, Heterophily, Graph Reconstruction, Graph Neural Networks.

## ACM Reference Format:

Zichen Wen, Tianyi Wu, Yazhou Ren, Yawen Ling, Chenhang Cui, Xiaorong Pu, and Lifang He. 2024. Dual-Optimized Adaptive Graph Reconstruction for Multi-View Graph Clustering. In *Proceedings of the 32nd ACM International Conference on Multimedia (MM '24)*, October 28–November 1, 2024, Melbourne, VIC, Australia. ACM, New York, NY, USA, 12 pages. <https://doi.org/10.1145/3664647.3680677>

## 1 Introduction

Clustering is a fundamental unsupervised learning task with broad applications across various fields [14, 18, 56]. Multi-view clustering (MVC) has obtained considerable interest owing to its capacity to harness information from multiple views [40, 50], thereby enhancing clustering performance [41, 42, 59, 63, 67]. Over the past few years, many MVC methods have been proposed, which can be generally classified into three primary categories [60]: co-training

\*Equal Contribution.

<sup>†</sup>Corresponding author.

Permission to make digital or hard copies of all or part of this work for personal or classroom use is granted without fee provided that copies are not made or distributed for profit or commercial advantage and that copies bear this notice and the full citation on the first page. Copyrights for components of this work owned by others than the author(s) must be honored. Abstracting with credit is permitted. To copy otherwise, or republish, to post on servers or to redistribute to lists, requires prior specific permission and/or a fee. Request permissions from [permissions@acm.org](mailto:permissions@acm.org).

MM '24, October 28–November 1, 2024, Melbourne, VIC, Australia

© 2024 Copyright held by the owner/author(s). Publication rights licensed to ACM.

ACM ISBN 979-8-4007-0686-8/24/10

<https://doi.org/10.1145/3664647.3680677>

approaches [6, 12, 24, 70, 72], low-rank matrix factorization techniques [48, 65, 66, 68], and subspace-based methods [7, 15, 19, 37, 45, 46, 51, 52, 61]. Nevertheless, they often fail to effectively utilize the common multi-view graph-structured data. With the development of graph neural networks (GNNs) [11, 13, 44], researchers have been interested in utilizing GNNs to extract the abundant structural information embedded in graph data [47]. However, labeling graph data becomes increasingly challenging as the amount of graph data grows. Therefore, multi-view graph clustering (MVGC) has emerged as a popular and valuable research area. Many GNN-based approaches have been proposed and have effectively advanced the development of MVGC. For example, Fan et al. [9] develop a one2multi graph autoencoder clustering framework (O2MAC) to capture the shared feature representation. Hassani and Ahmadi [16] propose to learn node and graph level representations by contrasting structural views of graphs. However, traditional GNNs are typically designed for homophilous graphs, where edges connect nodes of the same class. As a result, existing GNN-based MVGC methods are less effective when applied to heterophilous graphs, where edges connect nodes of diverse classes. In reality, heterophilous graph data is prevalent. For instance, in the context of protein chemistry, interactions often occur between different types of amino acids [2, 73]. In financial transaction networks, fraudulent users frequently engage in transactions with non-fraudulent users [39]. Additionally, dating networks often exhibit a higher number of connections between individuals of opposite genders [39, 69].

To address this challenge, several techniques have been introduced to improve GNNs for heterophilous graphs. These novel GNN variants aim to overcome the limitations of traditional GNNs, which rely on neighborhood aggregation mechanisms. They can be roughly divided into two groups [69]: non-local neighbor extension methods [1, 29, 36, 73] and GNNs architecture refinement methods [5, 29, 62]. Most of these methods enable newly designed GNNs to partially address the issue of heterophilous graphs by aggregating feature information from higher-order neighbors [17] or adapting the internal GNN structure. However, these methods increase the computational complexity of the model and even may degrade the performance of homophilous graph data [39] after structural modification to accommodate heterophilous graph data. Meanwhile, Li et al. [26] also point out that traditional GNNs have advantages in terms of simplicity [55], explainability [55], and efficiency [64] that GNN variants cannot match.

In addition, some studies have attempted to explore the reasons for the poor performance of traditional GNNs in dealing with heterophilous graphs and propose novel solutions from the point of the spectral domain [22]. For example, Bo et al. [2] design a mechanism that can integrate low-frequency signals, high-frequency signals, and raw features. Liu et al. [31] propose a novel graph representation learning method with edge heterophily discriminating (GREET) that learns representations by discriminating and leveraging homophilous edges and heterophilous edges. Luan et al. [32] propose adaptive channel mixing to exploit local and node-wise information from three channels: aggregation, diversification, and identity. Wen et al. [53] propose an adaptive hybrid graph filter related to homophily degree that adaptively captures low and high-frequency information. These spectral domain filtering methods aim to capture rich information in every frequency band of the

graph to acquire distinguishable node representations. Inevitably, however, to capture information in various frequency bands, these methods usually design multiple filters or design filters with multiple channels. Undoubtedly, training multiple filters will increase the training cost as it multiplies the parameters. Several studies have pointed out that traditional GNNs based on the homophily assumption are actually low-pass filters spectrally [25, 34]. In other words, designing diverse filters to capture graph signals in multiple frequency bands is actually equivalent to modifying GNNs in the spatial domain, which would also suffer from the same drawbacks as the previously mentioned GNN variants. Considering that traditional GNNs mining graph structure information still has advantages in some aspects and there are drawbacks in transforming GNNs in spatial and spectral domains, we propose to reconstruct the original graph structure so that the reconstructed graphs can be adapted to the traditional GNNs, as a way to solve the problem of heterophilous graphs in MVGC.

Our motivation is to reconstruct the graph that can be applied to message passing and neighborhood aggregation mechanisms of GNNs. To achieve this goal, we propose a dual-optimized adaptive graph reconstruction method. To be specific, we first construct the node correlation matrix. Although directly utilizing the node correlation matrix as a reconstruction graph can improve the homophily degree as shown in Table 3 of Appendix B, the node correlation matrix is only constructed based on the node feature information, which completely discards the original structural information of the graph, resulting in suboptimal performance. Taking into account both the degree of homophily and original structural information, we propose an adaptive mechanism for reconstructing the graph. Specifically, we utilize pseudo-labeling information to quantify the homophily degree of the original adjacency matrix. Based on this, the weight of the original adjacency matrix is assigned in the reconstruction graph to selectively preserve a certain amount of original structural information when the graph type is unknown.

To further optimize the graph structure, we develop a dual optimization strategy for the autoencoder. The first optimization comes from the autoencoder's reconstruction loss function, which can compress and denoise the data while preserving valid information about the input data. Furthermore, a random mask is applied to the original node feature information leading to the creation of an additively noisy feature matrix. Next, GNNs' message passing and neighborhood aggregation mechanisms are utilized to recover the noisy feature, followed by the use of a noise recovery loss function to minimize any differences between the recovered feature information and the original feature information. However, trainable parameters are not set for the GNN applied to recover feature information. Instead, only its aggregation mechanism is utilized. The training objective has now shifted to the autoencoder, and the noise recovery loss function directly propagates the gradient back to the autoencoder, optimizing its training process.

In summary, our main contributions are as follows:

- To alleviate the poor performance of GCN on heterophilous graphs, we design an adaptive graph reconstruction mechanism, employing the pseudo-labeling information.
- We devise a dual optimization strategy for reconstruction graphs, which makes reconstruction graphs more adaptable to neighborhood aggregation mechanisms.

- We demonstrate the feasibility of using the processing of noisy node feature recovery to assist the GCN aggregation process based on mutual information.
- Experimental results on real-world datasets and synthetic datasets indicate that our approach achieves state-of-the-art performance on most evaluation metrics.

## 2 Related Works

### 2.1 Multi-View Graph Clustering

Recently, researchers have been interested in utilizing GNNs to extract structural information from graphs. Numerous multi-view graph clustering methods have been proposed. Fan et al. [9] design a one2multi graph autoencoder to capture shared feature representation. Cheng et al. [4] propose two-pathway graph encoders to map graph embedding features and learn view-consistency information. Xia et al. systematically explore the cluster structure using a graph convolutional encoder trained to learn the self-expression coefficient matrix [57]. In addition to designing diverse graph encoders, contrastive learning methods are employed to extract information from graphs. Hassani and Ahmadi [16] introduce a self-supervised model to learn the node representations by contrasting structural views of graphs. Pan and Kang [35] employ contrastive learning to uncover the shared geometry and semantics in order to learn a consensus graph. Additionally, Lin and Kang utilize graph filtering techniques to smooth the features and learn a consensus graph for clustering [27]. Zhou and Du [71] enhance clustering by learning a consensus graph filter from multiple data views. Despite the attractive performance of these methods, they are often sensitive to the quality of graph structure. In other words, they generally do not perform well with heterophilous graphs.

### 2.2 Heterophilous Graph Representation Learning

Several efforts have been extended to address the issue of heterophilous graphs. Chien et al. [5] tackle heterophilous graph issues by employing GNNs that propagate using specially learnable weights. Chanpuriya and Musco [3] develop a feature extraction technique capable of adapting to graph structures exhibiting both homophily and heterophily. Li et al. propose an innovative graph restructuring approach that extends spectral clustering through alignment with node labels [26]. However, applying them to MVGC poses challenges as they heavily depend on true node label information. Additionally, there are unsupervised techniques aimed at addressing the heterophilous graph issue that do not depend on true labeling information, such as GREET [31], which discriminates between homophilous and heterophilous edges using an edge discriminator, enabling separate processing of these edges. Xiao et al. propose a decoupled self-supervised learning framework to decouple various underlying semantics among different neighborhoods [58]. While these methods partially address the heterophilous graph challenge, they are difficult to generalize to MVGC since these methods are designed for node classification tasks. The lack of a feasible and effective solution to mitigate the negative impact of heterophilous information still persists for heterophilous graphs in multi-view graph clustering.

## 3 Methodology

### 3.1 Preliminaries

In the task of multi-view graph clustering, the objective is to group a set of  $n$  nodes into  $k$  clusters. To achieve this, we utilize the notation  $\mathcal{G} = (\mathcal{V}, \mathcal{E})$  to denote a graph. Here,  $\mathcal{V}$  represents the nodes set, and the set of all nodes belonging to class  $i$  is represented as  $\mathcal{V}_i$ , with  $N = |\mathcal{V}|$ , and  $\mathcal{E} \subseteq \mathcal{V} \times \mathcal{V}$  represents the edge set with self-loops. The feature matrix for the nodes is denoted as  $\mathbf{X} \in \mathbb{R}^{N \times d}$ , and the symmetric adjacency matrix of the graph  $\mathcal{G}$  is represented by  $\mathbf{A} \in \mathbb{R}^{N \times N}$ , with elements  $a_{ij} = 1$  indicating the presence of an edge between node  $i$  and node  $j$ , and  $a_{ij} = 0$  otherwise. Additionally, we define the degree matrix of  $\mathbf{A}$  as  $\mathbf{D}_{ii}^v = \sum_j a_{ij}^v$ , enabling the normalization of each view's  $\mathbf{A}^v$  to  $\tilde{\mathbf{A}}^v = (\mathbf{D}^v)^{-1} \mathbf{A}^v$ . The normalized graph Laplacian matrix, denoted as  $\tilde{\mathbf{L}}^v$ , is then calculated as  $\mathbf{I} - \tilde{\mathbf{A}}^v$ , with  $\mathbf{I}$  representing the identity matrix.

### 3.2 Adaptive Graph Construction

To ensure the adaptability of GCN's neighborhood aggregation mechanism, it is necessary for a majority of the neighboring nodes in the reconstruction graph to be of the same class as the central node. Nodes belonging to the same class tend to have similar node feature vectors. Therefore, we prioritize the feature information of the nodes and aim to construct the graph by mining the correlation between their features. In this way, the resulting graph aligns with our expectation of connecting nodes to neighboring nodes that share the same label.

Firstly, we harness the remarkable capabilities of autoencoder to extract node feature information and refine the original features of the nodes within the graph:

$$\mathbf{Z}^v = f^v(\sigma(\mathbf{X}; \mathbf{W}_\theta)), \quad (1)$$

$$\tilde{\mathbf{X}}^v = g^v(\sigma(\mathbf{Z}^v; \mathbf{W}_\phi)), \quad (2)$$

where  $\mathbf{Z}^v \in \mathbb{R}^{N \times d_{Z^v}}$ ,  $v \in V$ .  $\mathbf{W}_\theta$  and  $\mathbf{W}_\phi$  represent the learnable parameters of the encoder and decoder in the  $v$ -th view respectively, and  $\sigma(\cdot)$  is the activation function.

After this, we explore the correlation among nodes by computing the cosine similarity between nodes features and derive the correlation matrix  $\mathbf{S}^v$ :

$$\mathbf{S}^v = \text{Sim}(\mathbf{Z}^v, \mathbf{Z}^{vT}) = \frac{\mathbf{Z}^v \cdot \mathbf{Z}^{vT}}{\|\mathbf{Z}^v\| \cdot \|\mathbf{Z}^{vT}\|}, \quad (3)$$

where  $\text{Sim}(\cdot)$  represents the cosine similarity function in vector space. Intuitively, if node  $i$  and node  $j$  belong to the same class, then  $\mathbf{S}_{ij}^v$  will have a larger value in the correlation matrix  $\mathbf{S}^v$ , indicating that nodes  $i$  and  $j$  are similar and connected.

Directly using  $\mathbf{S}^v$  as a reconstruction graph improves the homophily degree of the graph to some extent. Nevertheless, only utilizing the node feature information and totally disregarding the original structural information of the graph may not be entirely beneficial to our graph reconstruction. Therefore, we propose a selective utilization of the original graph structure information to reconstruct graphs while maintaining a high degree of homophily. To accomplish this, we design an adaptive reconstruction graph mechanism. Specifically, we attempt to quantify the degree of homophily in the original graph structure and subsequently assign appropriate weights. However, in the unsupervised context, access

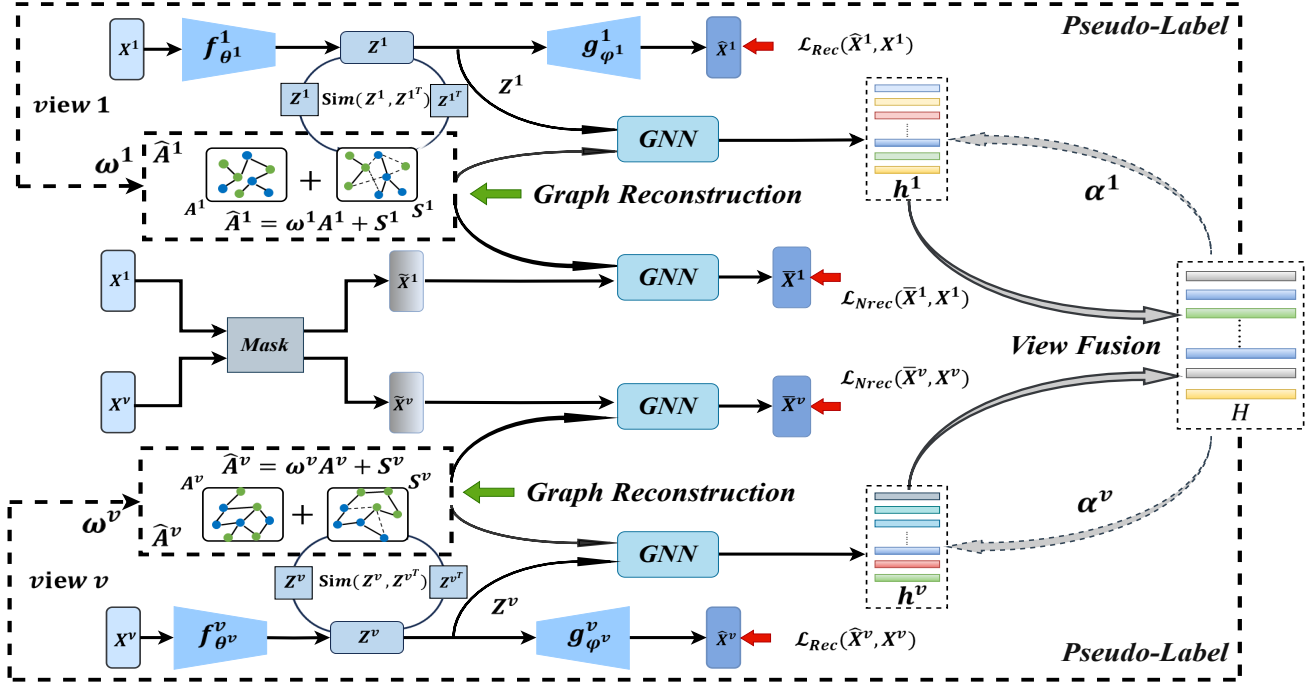

Figure 1: The framework of our DOAGC model. The inputs to each view are the node feature matrix  $X$  and the original adjacency matrix  $A$ . The output is the consensus embedding  $H$  fused by each view node embedding  $h$ , after which  $H$  is used as  $k$ -means input for clustering.

to true labeling information is not available. For this reason, we choose to approximate the homophily degree of the original graph structure by using the pseudo-labeling information obtained from the final consensus embedding  $H$  of Eq. (12):

$$w^v = \frac{\sum_{i,j} (A_{i,j}^v \odot \bar{Y}_i \bar{Y}_j^T - \mathbf{I}_{i,j})}{\sum_{i,j} (A_{i,j}^v - \mathbf{I}_{i,j})}, \quad (4)$$

where  $w^v$  denotes the original graph weight obtained after homophily degree computation from the last iteration,  $\odot$  represents the Hadamard product,  $\bar{Y} \in \{0, 1\}^{n \times c}$  is the pseudo label obtained from the clustering of consensus embedding  $H$ .

Finally, we obtain the reconstruction graph that incorporates the assessment of the homophily level and original structural data:

$$\hat{A}^v = S^v + w^v A^v. \quad (5)$$

As shown in Fig. 2,  $w^v$  can converge from different initialization values to the same value that is close to the true homophily degree through the adaptive mechanism, which indicates that the adaptive mechanism is stable and meets our expectations.

### 3.3 Dual Optimization Strategy for Reconstruction Graph

There is a significant disparity between solely reconstructing graphs based on extracting correlation information among nodes and our objective, which is to construct graphs optimized for GCN neighborhood aggregation mechanism. Therefore, we devise a dual optimization strategy to improve the reconstruction graph in Section 3.2.

Specifically, we first design the reconstruction loss function of the autoencoder utilizing the cross-entropy loss:

$$\mathcal{L}_{Rec} = \sum_{v=1}^V l(\hat{X}^v, X^v) = - \sum_{v=1}^V \sum_{i,j} (\hat{x}_{ij}^v \cdot \log(x_{ij}^v)). \quad (6)$$

As the first optimization of the reconstruction graph, the reconstruction loss of the autoencoder mainly ensures the validity of the information extracted from the node feature matrix, i.e.,  $Z$  is able to reflect the essential attributes of the nodes, and the valid information of the node features will not be lost in the process of dimensionality reduction and denoising.

Furthermore, we design the second optimization process. Specifically, we begin by adding a random mask as noise to the original matrix  $X$  of node features. Then, we utilize GCN's neighborhood aggregation mechanism to recover the feature information following the addition of noise, which can be represented from  $\tilde{X} \xrightarrow{AGG_{\hat{A}}} \tilde{X} \rightarrow X$  (**Process 2**), where  $\tilde{X}$  denotes the nodes features with random mask (noisy features),  $\tilde{X}$  means the nodes features recovered by the aggregation mechanism of GCN and  $AGG_{\hat{A}}$  denotes the aggregation operation of GCN using reconstruction graph. The noise recovery loss is defined as follows:

$$\mathcal{L}_{Nrec} = \sum_{v=1}^V l(\tilde{X}^v, X^v) = - \sum_{v=1}^V \sum_{i,j} (\tilde{x}_{ij}^v \cdot \log(x_{ij}^v)), \quad (7)$$

where  $\tilde{X}^v = GCN(\hat{A}^v, \tilde{X}^v)$ .

In fact, the second optimization process attempts to optimize the reconstruction graph in the form of supervised learning. Due to the unknowability of labels in unsupervised tasks, we cannot directly

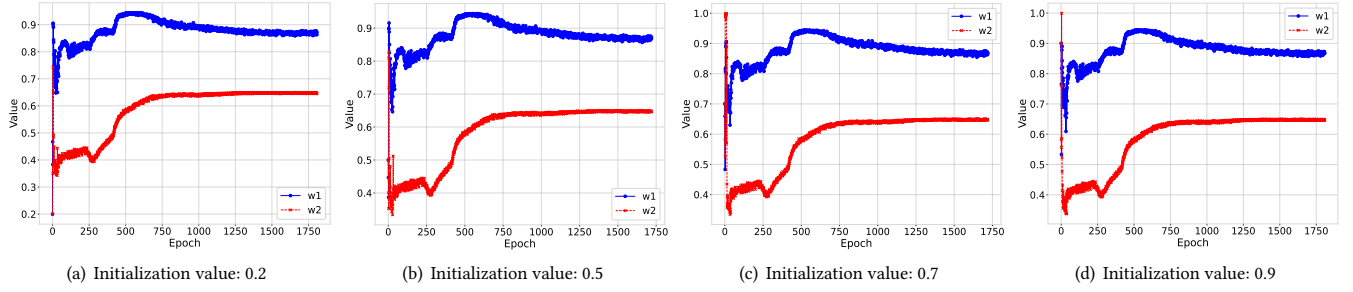Figure 2: The adaptive process of  $w$  on ACM.

utilize the true label information to supervise the reconstruction of graph, making the aggregated features  $\mathbf{h}$  approximate the true label  $Y$ , i.e.,  $\mathbf{X} \xrightarrow{AGG_A} \mathbf{h} \rightarrow Y$  (**Process 1**).

Intuitively, we believe that a graph suitable for predicting node features is also suitable for predicting node labels. Therefore, we introduce **Process 2** to enhance **Process 1**. As shown below, we utilize mutual information theory to speculate on the validity and rationality of **Process 2**. Specific symbol explanations are shown in Table 1 of Appendix A.

**LEMMA 3.1.** [10] Let  $\tilde{\mathbf{X}}_{\tilde{y}_i}$  and  $\tilde{\mathbf{X}}_{y_i}$  be mutually redundant for  $x_i$ , i.e., the feature of node  $i$ , where  $\tilde{\mathbf{X}}_{\tilde{y}_i}$  and  $\tilde{\mathbf{X}}_{y_i}$  denotes the nodes features with random masks belonging to different and the same class as node  $i$  respectively. The recovered feature  $\tilde{x}_i$  is aggregated from  $\tilde{\mathbf{X}}_{y_i}$ . If  $\tilde{x}_i$  is sufficient for  $\tilde{\mathbf{X}}_{\tilde{y}_i}$  ( $I(\tilde{\mathbf{X}}_{\tilde{y}_i}; \tilde{\mathbf{X}}_{y_i} | \tilde{x}_i) = 0$ ), the mutual information between  $x_i$  and  $\tilde{x}_i$  have the following relationship:

$$I_\theta(x_i; \tilde{x}_i) = I_\theta(x_i; \tilde{\mathbf{X}}_{y_i}, \tilde{\mathbf{X}}_{\tilde{y}_i}) = I_\theta(x_i; \tilde{\mathbf{X}}), \quad (8)$$

where  $\theta$  denotes the learnable parameters of the autoencoder. The proof is given in Appendix A.

The left side of Eq. (8) is the object we need to optimize, i.e.,  $\mathcal{L}_{Nrec}$  in Eq. (7).

Similarly, replacing the symbol of **Process 2** in Eq. (8) with the corresponding symbol of **Process 1**, we have:

$$I_\theta(y_i; h_i) = I_\theta(y_i; \mathbf{X}), \quad (9)$$

**Hypothesis 1:** The distribution of node features  $\mathbf{X}$  can be seen as a joint distribution of fragmented information of node label  $y$  ( $\tilde{Y}$ ) and random noise ( $e$ ).

Based on **Hypothesis 1**, we have:

$$\begin{aligned} I_\theta(y_i; h_i) &= I_\theta(y_i; \mathbf{X}) \\ &= I_\theta(y_i; \tilde{Y}, e) \\ &= I_\theta(y_i; \tilde{Y}) + I_\theta(y; e | \tilde{Y}) \\ &= I_\theta(y_i; \tilde{Y}). \end{aligned} \quad (10)$$

Eq. (10) implies that the process of aggregating node features in GCN, with the goal of maximizing the mutual information between  $y_i$  and  $h_i$  ( $I_\theta(y_i; h_i)$ ), can be viewed as a way of consolidating fragmented label information.

Then, we obtain two formulas:  $I_\theta(x_i; \tilde{x}_i) = I_\theta(x_i; \tilde{\mathbf{X}})$  and  $I_\theta(y_i; h_i) = I_\theta(y_i; \tilde{Y})$  that correspond to **Process 2** and **Process 1**, respectively. We can also observe similarity between the two processes: they are both the process of integrating fragmented information

that belongs to the same category. These two processes share same graph structure, and the elements involved can all correspond one-to-one. So, if we can train **Process 2** well and optimize the reconstruction graph i.e., minimizing  $\mathcal{L}_{Nrec}$ , the Eq. (10), alternatively, the aggregation process of GCN, can also benefit from it.

### 3.4 View Weighting and Fusion

In a multi-view task, different views contain not exactly the same information, i.e., there is consistency and complementarity among the views [21, 54]. To fully utilize the complementary information among views, we attempt to get a consensus embedding containing rich information by fusing the node embedding  $\mathbf{h}^v$  of each view [20]. However, to account for the varying information values of different views, it is essential to assign suitable weights to each view based on their quality evaluation. This weighting scheme ensures that different views make distinct contributions to the final consensus embedding. We first obtain the node embedding for each view:

$$\mathbf{h}^v = GCN(\hat{\mathbf{A}}^v, \mathbf{Z}^v). \quad (11)$$

Naturally, it occurs to us to utilize the obtained consensus embedding  $\mathbf{H}$  to in turn guide the embedding  $\mathbf{h}^v$  of each view to assign weights to it. Specifically, if a view's embedding  $\mathbf{h}^v$  is similar to the consensus embedding, then the information it carries must be important and we assign larger weight to it, and vice versa. We obtain the consensus embedding  $\mathbf{H}$  as follows:

$$\mathbf{H} = \sum_{v=1}^V \alpha^v \mathbf{h}^v, \quad (12)$$

where  $\alpha^v$  denotes the weight of the node embedding for the  $v$ -th view and is calculated as follows:

$$\alpha^v = \left( \frac{eva^v}{\max(eva^1, eva^2, \dots, eva^V)} \right)^\rho. \quad (13)$$

Here  $eva^v$  is obtained from the evaluation function that computes the similarity between the consensus embedding  $\mathbf{H}$  and each view embedding  $\mathbf{h}^v$ , i.e.,  $eva^v = evaluation(\mathbf{h}^v, \mathbf{H})$ . The hyperparameter  $\rho$  is used to adjust the degree of smoothing or sharpening of the view weights. For the final consensus embedding  $\mathbf{H}$ , we apply the  $k$ -means algorithm to get the clustering results.

## 4 Experiments

### 4.1 Evaluation Setup and Metrics

**4.1.1 Datasets.** To evaluate the effectiveness of the proposed method, we conducted experiments on nine graph datasets with

**Table 1: The detailed statistics information of the six graph datasets.**

| Datasets         | ACM                            | DBLP                                          | Minesweeper                    | Cornell                        | Chameleon                      | Wisconsin                      |
|------------------|--------------------------------|-----------------------------------------------|--------------------------------|--------------------------------|--------------------------------|--------------------------------|
| Nodes            | 3,025                          | 4,057                                         | 10000                          | 183                            | 2,277                          | 251                            |
| Features         | 1,830                          | 334                                           | 7                              | 1,703                          | 2,325                          | 1,703                          |
| Clusters         | 3                              | 4                                             | 2                              | 5                              | 5                              | 5                              |
| Graphs           | $\mathcal{G}_1, \mathcal{G}_2$ | $\mathcal{G}_1, \mathcal{G}_2, \mathcal{G}_3$ | $\mathcal{G}_1, \mathcal{G}_2$ | $\mathcal{G}_1, \mathcal{G}_2$ | $\mathcal{G}_1, \mathcal{G}_2$ | $\mathcal{G}_1, \mathcal{G}_2$ |
| Homophily degree | 0.82, 0.64                     | 0.80, 0.67, 0.32                              | 0.68, 0.68                     | 0.30, 0.30                     | 0.23, 0.23                     | 0.19, 0.19                     |

**Table 2: The clustering results on six real-world datasets. The best results are shown in bold, and the second-best results are underlined. All experimental results were averaged after performing the experiment five times and the hyperparameter settings for all baseline models followed the recommendations in their respective original papers.**

| Method/Datasets | ACM         |             |             |             | DBLP        |             |             |             | Minsweeper |            |             |             |
|-----------------|-------------|-------------|-------------|-------------|-------------|-------------|-------------|-------------|------------|------------|-------------|-------------|
|                 | NMI%        | ARI%        | ACC%        | F1%         | NMI%        | ARI%        | ACC%        | F1%         | NMI%       | ARI%       | ACC%        | F1%         |
| VGAE (2016)     | 49.1        | 54.4        | 82.2        | 82.3        | 69.3        | 74.1        | 88.6        | 87.4        | 4.1        | <b>8.9</b> | <u>69.7</u> | 60.1        |
| DAEGC (2019)    | 63.8        | 70.1        | 89.0        | 88.9        | 30.8        | 33.4        | 66.5        | 65.6        | <u>5.1</u> | 3.1        | 58.9        | 55.2        |
| AGE (2020)      | <u>73.5</u> | 78.9        | 92.4        | 92.4        | 45.0        | 47.6        | 75.3        | 74.6        | <b>6.2</b> | <u>4.6</u> | 60.7        | <u>60.7</u> |
| O2MAC (2020)    | 69.2        | 73.9        | 90.4        | 90.5        | 72.9        | 77.8        | 90.7        | 90.1        | 2.9        | 1.6        | 58.3        | 53.9        |
| MvAGC (2020)    | 67.4        | 72.1        | 89.8        | 89.9        | 77.2        | <u>82.8</u> | 92.8        | 92.3        | 0.5        | -1.3       | 58.8        | 46.5        |
| AGCN (2021)     | 68.4        | 74.2        | 90.6        | 90.6        | 39.7        | 42.5        | 73.3        | 72.8        | 0.0        | -2.1       | 60.6        | 46.7        |
| MCGC (2021)     | 71.3        | 76.3        | 91.5        | 91.6        | <b>83.0</b> | 77.5        | <u>93.0</u> | <u>92.5</u> | 0.3        | -1.7       | 66.3        | 47.1        |
| DCRN (2022a)    | 71.6        | 77.6        | 91.9        | 91.9        | 49.0        | 53.6        | 79.7        | 79.3        | 1.2        | 4.5        | 64.4        | 54.6        |
| DualGR (2023)   | 73.2        | <u>79.4</u> | <u>92.7</u> | <u>92.7</u> | 75.5        | 81.7        | 92.4        | 91.8        | 0.2        | -0.3       | 60.0        | 47.8        |
| DOAGC (ours)    | <b>78.2</b> | <b>83.5</b> | <b>94.2</b> | <b>94.3</b> | <u>79.5</u> | <b>84.3</b> | <b>93.4</b> | <b>92.9</b> | 0.4        | -1.6       | <b>78.5</b> | <b>78.5</b> |

  

| Method/Datasets | Cornell     |             |             |             | Chameleon   |             |             |             | Wisconsin   |             |             |             |
|-----------------|-------------|-------------|-------------|-------------|-------------|-------------|-------------|-------------|-------------|-------------|-------------|-------------|
|                 | NMI%        | ARI%        | ACC%        | F1%         | NMI%        | ARI%        | ACC%        | F1%         | NMI%        | ARI%        | ACC%        | F1%         |
| VGAE (2016)     | 7.6         | 11.2        | 53.4        | 26.8        | 15.1        | 12.4        | 35.4        | 29.6        | 10.5        | 13.7        | 49.3        | 34.1        |
| DAEGC (2019)    | 7.4         | 3.8         | 35.0        | 28.2        | 9.1         | 5.6         | 32.2        | 31.2        | 10.6        | 3.4         | 32.7        | 28.3        |
| AGE (2020)      | 9.6         | 7.8         | 43.2        | <u>43.2</u> | 8.6         | 7.6         | 32.4        | 32.4        | 9.3         | 1.3         | 31.1        | 31.1        |
| O2MAC (2020)    | 5.6         | 4.1         | 42.3        | 26.4        | 12.3        | 8.9         | 33.5        | 28.6        | 11.0        | 8.9         | 40.0        | 27.9        |
| MvAGC (2020)    | 10.0        | 0.1         | 45.5        | 19.2        | 10.8        | 3.3         | 29.2        | 24.3        | 8.1         | 4.8         | 47.7        | 20.6        |
| AGCN (2021)     | 5.0         | 2.5         | 56.3        | 19.9        | 6.7         | 6.1         | 32.5        | 20.4        | 6.4         | 6.8         | 49.8        | 24.9        |
| MCGC (2021)     | 7.7         | 9.2         | 55.7        | 29.6        | 9.5         | 5.9         | 30.0        | 19.1        | 12.9        | 5.9         | 51.8        | 30.7        |
| DCRN (2022a)    | 20.5        | <u>32.8</u> | <u>66.1</u> | 40.5        | 8.7         | 5.7         | 30.9        | 21.9        | 10.8        | 16.0        | 50.2        | 34.1        |
| DualGR (2023)   | <u>28.5</u> | 22.4        | 57.0        | 41.0        | <u>19.5</u> | <u>16.0</u> | <u>41.1</u> | <u>37.7</u> | <u>34.1</u> | <u>28.8</u> | <u>56.4</u> | <u>47.1</u> |
| DOAGC (ours)    | <b>43.1</b> | <b>46.4</b> | <b>73.2</b> | <b>45.1</b> | <b>22.1</b> | <b>18.5</b> | <b>44.2</b> | <b>40.4</b> | <b>55.5</b> | <b>57.4</b> | <b>79.7</b> | <b>54.5</b> |

different homophily degrees. **ACM** [9] is derived from the ACM database<sup>1</sup> and is composed of two graphs: the co-paper network and the co-subject network. **DBLP** [9], sourced from the DBLP database<sup>2</sup>, consists of three graphs: co-author, co-conference, and co-term. **Minesweeper** is a synthetic graph emulating the eponymous game [39]. **Wisconsin** and **Cornell** [36] are webpage graphs from WebKB<sup>3</sup> and **Chameleon** is a subset of the Wikipedia network [43]. The detailed statistics of the datasets are presented in Table 1 and Appendix B.

**4.1.2 Evaluation Metrics.** We utilize accuracy (ACC), normalized mutual information (NMI), adjusted rand index (ARI), and F1-score (F1) to evaluate the clustering performance of the proposed model.

**4.1.3 Comparison Methods.** To validate the superiority of the proposed method, we utilize popular benchmarks for comparative experiments and analysis. VGAE [23] and AGE [8] represent

two distinct graph encoding techniques. DAEGC [49] is a goal-directed deep attentional embedded graph clustering framework. O2MAC [9] is an approach that acquires information from both node features and graph structures. MvAGC [4] and MCGC [35] represent two recent graph-based methods that utilize graph filtering to acquire a consensus graph. AGCN [38] is an attention-driven graph clustering network. DCRN [30] is a method that improves the performance of graph clustering by reducing the information correlation. DualGR [28] utilizes soft-labels and pseudo-labels to provide guidance in the process of refining and fusing graphs for clustering.

## 4.2 Performance Comparison

Table 2 presents the clustering performance of all compared methods on six real-world graph datasets. From the results, we can see that DOAGC demonstrates competitive performance. Specifically, when facing graph datasets with a high homophily degree, such as ACM (HR **0.82** & **0.64**), DBLP (HR **0.80** & **0.67** & 0.32), and Minesweeper (HR **0.68** & **0.68**), DOAGC on ACM outperforms the SOTAs in ACC, NMI, ARI, and F1 by 1.5%, 4.7%, 4.1%, and 1.6%,

<sup>1</sup><https://dl.acm.org/>

<sup>2</sup><https://dblp.uni-trier.de/>

<sup>3</sup><http://www.cs.cmu.edu/afs/cs.cmu.edu/project/theo-11/www/wwkb>

**Table 3: The clustering results on six synthetic ACM graph datasets with different homophily degrees. The best results are shown in bold. And the second-best results are underlined.**

| Method/Datasets | ACM00 (HR 0.00 & 0.00) |             |             |             | ACM01 (HR 0.10 & 0.10) |             |             |             | ACM02 (HR 0.20 & 0.20) |             |             |             |
|-----------------|------------------------|-------------|-------------|-------------|------------------------|-------------|-------------|-------------|------------------------|-------------|-------------|-------------|
|                 | NMI%                   | ARI%        | ACC%        | F1%         | NMI%                   | ARI%        | ACC%        | F1%         | NMI%                   | ARI%        | ACC%        | F1%         |
| VGAE (2016)     | 0.5                    | 0.5         | 37.4        | 37.1        | 0.5                    | 0.5         | 37.1        | 35.6        | 0.4                    | 0.4         | 36.9        | 34.9        |
| DAEGC (2019)    | 43.5                   | 46.4        | 77.5        | 76.1        | 19.8                   | 22.5        | 64.0        | 63.5        | 5.0                    | 5.5         | 43.6        | 43.2        |
| AGE (2020)      | 0.0                    | 0.0         | 33.5        | 33.5        | 0.0                    | 0.0         | 34.3        | 33.9        | 0.1                    | 0.0         | 34.9        | 34.7        |
| O2MAC (2020)    | 25.0                   | 24.7        | 55.0        | 54.6        | 17.6                   | 17.1        | 49.9        | 49.7        | 9.6                    | 9.4         | 42.9        | 42.8        |
| MvAGC (2020)    | 0.9                    | 0.9         | 37.1        | 35.5        | 1.9                    | 2.0         | 40.9        | 39.1        | 5.3                    | 5.6         | 45.7        | 45.4        |
| AGCN (2021)     | 0.8                    | 0.8         | 38.7        | 38.5        | 0.7                    | 0.7         | 36.4        | 36.2        | 4.1                    | 4.4         | 44.7        | 44.5        |
| MCGC (2021)     | 49.8                   | 42.9        | 63.0        | 53.5        | 52.9                   | 44.7        | 63.9        | 54.6        | 29.1                   | 31.7        | 67.7        | 67.2        |
| DuaLGR (2023)   | <u>55.1</u>            | <u>60.7</u> | <u>84.8</u> | <u>84.5</u> | <u>55.9</u>            | <u>61.7</u> | <u>85.3</u> | <u>85.0</u> | <u>59.2</u>            | <u>66.0</u> | <u>87.3</u> | <u>87.1</u> |
| DOAGC (ours)    | <b>63.0</b>            | <b>70.4</b> | <b>89.2</b> | <b>89.2</b> | <b>63.4</b>            | <b>70.7</b> | <b>89.3</b> | <b>89.3</b> | <b>63.3</b>            | <b>70.7</b> | <b>89.3</b> | <b>89.3</b> |

  

| Method/Datasets | ACM03 (HR 0.30 & 0.30) |             |             |             | ACM04 (HR 0.40 & 0.40) |             |             |             | ACM05 (HR 0.50 & 0.50) |             |             |             |
|-----------------|------------------------|-------------|-------------|-------------|------------------------|-------------|-------------|-------------|------------------------|-------------|-------------|-------------|
|                 | NMI%                   | ARI%        | ACC%        | F1%         | NMI%                   | ARI%        | ACC%        | F1%         | NMI%                   | ARI%        | ACC%        | F1%         |
| VGAE (2016)     | 0.7                    | 0.7         | 38.0        | 37.6        | 9.7                    | 8.1         | 48.4        | 49.0        | 26.2                   | 27.0        | 65.9        | 66.4        |
| DAEGC (2019)    | 3.8                    | 4.1         | 45.4        | 45.2        | 19.3                   | 22.6        | 64.8        | 64.9        | 41.4                   | 48.4        | 79.7        | 79.6        |
| AGE (2020)      | 0.2                    | 0.1         | 35.1        | 35.0        | 13.5                   | 15.5        | 50.9        | 48.4        | 24.1                   | 21.5        | 59.2        | 57.1        |
| O2MAC (2020)    | 6.7                    | 6.5         | 40.7        | 40.5        | 5.5                    | 5.4         | 40.3        | 40.2        | 6.6                    | 6.7         | 42.7        | 42.6        |
| MvAGC (2020)    | 15.4                   | 16.5        | 57.7        | 57.7        | 36.9                   | 39.5        | 74.0        | 74.2        | 64.6                   | 71.1        | 89.4        | 89.4        |
| AGCN (2021)     | 1.2                    | 1.1         | 38.9        | 39.0        | 0.1                    | 0.0         | 34.8        | 34.8        | 1.5                    | 1.5         | 40.3        | 40.4        |
| MCGC (2021)     | 51.8                   | 57.2        | 83.0        | 82.9        | 83.9                   | 88.8        | 96.2        | 96.2        | 91.0                   | 94.4        | 98.1        | 98.1        |
| DuaLGR (2023)   | <b>60.2</b>            | <b>67.6</b> | <b>88.0</b> | <b>88.0</b> | <b>85.1</b>            | <b>90.1</b> | <b>96.6</b> | <b>96.6</b> | <u>97.8</u>            | <u>98.9</u> | <u>99.6</u> | <u>99.6</u> |
| DOAGC (ours)    | <u>57.4</u>            | <u>64.8</u> | <u>86.9</u> | <u>86.9</u> | <u>72.8</u>            | <u>79.1</u> | <u>92.5</u> | <u>92.4</u> | <b>98.2</b>            | <b>99.1</b> | <b>99.7</b> | <b>99.7</b> |

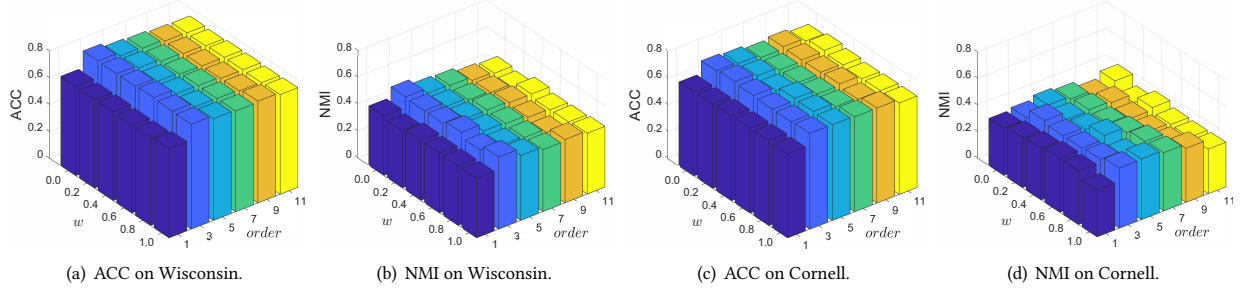**Figure 3: Sensitive analysis of ACC and NMI on Wisconsin and Cornell with order and  $w$ .**

respectively. Meanwhile, it surpasses others on most metrics in both DBLP and Minesweeper. Specifically, it increases ACC, ARI, and F1 on DBLP by 1.0%, 2.6%, and 1.1%, respectively, and ACC, F1 on Minesweeper by 8.8%, and 17.8%, respectively. Furthermore, unlike the poor performance of other baselines on heterophilous graph datasets, DOAGC achieves excellent performance on graphs with low homophily degree. The ACC of our model reaches 79.7% on Wisconsin, while the second-best DualGR [28] is only 56.4%, which appears similar on Cornell and Chameleon.

Table 3 demonstrates the comparison results on six synthetic ACM datasets, and the results show that DOAGC also performs well on the same dataset with different homophily degrees. Comparing DOAGC with other baselines on diverse homophily degrees, our method effectively addresses the challenge faced by previous graph clustering approaches on heterophilous graphs. This enables traditional GNNs, relying on homophily assumptions, to fully leverage structural information mining on heterophilous graphs.

### 4.3 Ablation Study

**4.3.1 Effect of Each Loss.** To explore the importance and effectiveness of each loss function for the proposed model, we removed each loss function separately to observe the change in clustering performance. The detailed data on the ablation experiments for the loss function is presented in Table 4. As indicated in Table 4, both the reconstruction loss  $\mathcal{L}_{Rec}$  and the noise recovery loss  $\mathcal{L}_{Nrec}$  affect the model’s performance. The reconstruction loss  $\mathcal{L}_{Rec}$  plays a dominant role in the model’s performance, and removing it would lead to a significant decrease in performance. Due to the fact that  $\mathcal{L}_{Rec}$  and  $\mathcal{L}_{Nrec}$  optimize the autoencoder for training by returning the training gradient to it, in other words, both losses have an optimizing effect, but the  $\mathcal{L}_{Rec}$  has greater optimization intensity.

**4.3.2 Effect of Each Component.** To investigate how the reconstruction graph  $\hat{A}^v$  affects the model’s performance, we conducted an in-depth ablation analysis of the reconstruction graphs. Specifically, we remove  $S^v$  and  $A^v$  in the reconstruction graph respectively. As shown in Table 3, the model’s performance is impacted by the removal of either  $S^v$  or  $A^v$ . Removing  $S^v$  has a greater impact on the



**Table 4: The ablation study results of DOAGC on Wisconsin and Cornell. The original results are shown in bold.**

| Components / Datasets             | Wisconsin   |             |             |             | Cornell     |             |             |             |
|-----------------------------------|-------------|-------------|-------------|-------------|-------------|-------------|-------------|-------------|
|                                   | NMI%        | ARI%        | ACC%        | F1%         | NMI%        | ARI%        | ACC%        | F1%         |
| DOAGC (w/o $\mathcal{L}_{Rec}$ )  | 45.5        | 47.2        | 65.3        | 50.2        | 31.6        | 29.7        | 61.7        | 45.1        |
| DOAGC (w/o $\mathcal{L}_{Nrec}$ ) | 50.4        | 53.2        | 77.7        | 53.3        | 39.1        | 45.2        | 71.6        | 43.4        |
| DOAGC (w/o $S^v$ )                | 10.4        | 10.6        | 49.4        | 35.1        | 10.0        | 14.9        | 52.1        | 31.3        |
| DOAGC (w/o $A^v$ )                | 51.8        | 52.9        | 77.6        | 49.8        | 38.3        | 45.1        | 71.6        | 40.4        |
| <b>DOAGC (ours)</b>               | <b>55.5</b> | <b>57.4</b> | <b>79.7</b> | <b>54.5</b> | <b>43.1</b> | <b>46.4</b> | <b>73.2</b> | <b>45.1</b> |

model’s performance compared to removing  $A^v$ .  $S^v$  is constructed using node feature information based on the cosine similarity between each pair of nodes. Intuitively, due to the high probability that the nodes with similar feature information belong to the same class, the constructed  $S^v$  has a greater edge weight among similar nodes, i.e., a higher homophily degree. Removing  $S^v$  will greatly reduce the homophily degree of the reconstruction graph, leading to the inability of the GCN message passing mechanism to function, which in turn leads to a decrease in the model performance.  $A^v$  is the original adjacency matrix, and although the removal of  $A^v$  still allows the reconstruction graph to maintain a high homophily degree, the complete abandonment of the original structural information still has an impact on the model performance.

**4.3.3 Convergence Analysis.** We performed experiments on eight real-world datasets with varying degrees of homophily. Fig. 4 shows the detailed results of the experiments about convergence analysis, where the left subgraph refers to the ACM, DBLP, and IMDB with a high homophily degree; the right subgraph refers to the EAT, Texas, Chameleon, Wisconsin, and Cornell with a low homophily degree. As depicted in Fig. 4, the three real-world datasets ACM, DBLP, and IMDB, start to converge before the 50th epoch. During the initial stage of iteration, the loss values significantly decrease. In contrast, for the heterophilous graph datasets such as Texas and Chameleon, they reach the convergence state at epoch = 100, and the loss values gradually decrease thereafter. Overall, our proposed model achieves faster convergence and a significantly reduced loss value in both homophilous and heterophilous graphs, validating the reliability of our proposed model and the efficacy of our dual-optimization training approach.

**4.3.4 Parameter Sensitivity Analysis.** Figure 3 illustrates the parameter sensitivity analysis for  $order$  and  $w$ .  $order$  denotes the degree of GCN neighborhood aggregation, where a higher  $order$

implies that the node can aggregate information from more distant nodes.  $w$  represents the initial weight of adjacency matrix  $A^v$  in Eq. (5). A higher value of  $w$  indicates that the reconstructed graph  $\hat{A}^v$  contains more of the original structural information at the beginning of the iteration. As shown in subfigures (a) and (c) of Fig. 3, we perform experiments on the Wisconsin and Cornell datasets using different combinations of  $order$  and  $w$  to examine the variations in ACC. As observed, fixed  $order$  renders initial  $w$  insignificant. DOAGC shows consistent and stable performance regardless of weights in the initial adjacency matrix  $A^v$ . Regarding  $order$ , DOAGC achieves excellent performance at  $order = 3$ . Further increasing  $order$  does not improve the model’s performance and may even result in a slight decline. This indicates that our method does not require high-order aggregation with increased complexity. Moreover, it suggests that the reconstructed graph  $\hat{A}^v$  predominantly consists of neighboring nodes with the same classifications.

For subfigures (b) and (d) in Fig. 3 related to NMI, the NMI on Wisconsin parallels the description of ACC on Wisconsin above. Cornell’s NMI demonstrates slight sensitivity to its parameters, yielding higher values at  $order \in \{3, 5, 7\}$ , and lower values when the  $order$  is either too low or too high. When  $order$  is low, nodes struggle to aggregate extensive neighbor information. Conversely, with a high  $order$ , nodes tend to aggregate feature information from distant nodes. However, in our reconstruction graph  $\hat{A}^v$ , distant high-order neighbor nodes are more likely to belong to different classes, resulting in the aggregation of conflicting information. This, in turn, contributes to a decrease in NMI.

## 5 Conclusion

In this paper, we address the challenge of heterophilous graphs in MVGC and propose DOAGC, a dual-optimization adaptive graph reconstruction multi-view clustering method. DOAGC focuses on reconstructing graphs to facilitate the message passing and neighbor aggregation mechanisms of conventional GNNs. We extract node correlation from feature information and introduce an adaptive mechanism utilizing pseudo-labeling information derived from consensus embedding. Additionally, we propose a dual optimization strategy to enhance the compatibility of the reconstructed graph with traditional GNNs. The efficacy of the optimization strategy is validated through mutual information theory. Our proposed approach achieves outstanding results on eight real-world datasets and six synthetic datasets with varying homophily degrees, providing evidence that DOAGC effectively addresses the heterophilous graph problem encountered by MVGC, while simultaneously maintaining exceptional clustering performance on homophilous graphs.

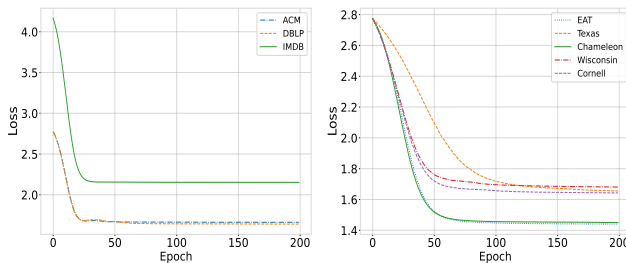**Figure 4: Convergence analysis.**



## Acknowledgments

This work was supported in part by Sichuan Science and Technology Program (No. 2024NSFSC1473) and in part by Shenzhen Science and Technology Program (No. JCYJ20230807115959041). Lifang He is partially supported by the NSF grants (MRI-2215789, IIS-1909879, IIS-2319451), NIH grant under R21EY034179, and Lehigh's grants under Accelerator and CORE.

## References

- [1] Sami Abu-El-Haija, Bryan Perozzi, Amol Kapoor, Nazanin Alipourfard, Kristina Lerman, Hrayr Harutyunyan, Greg Ver Steeg, and Aram Galstyan. 2019. MixHop: Higher-Order Graph Convolutional Architectures via Sparsified Neighborhood Mixing. In *ICML*. 21–29.
- [2] Deyu Bo, Xiao Wang, Chuan Shi, and Huawei Shen. 2021. Beyond Low-frequency Information in Graph Convolutional Networks. In *AAAI*. 3950–3957.
- [3] Sudhanshu Chaturvedi and Cameron Musco. 2022. Simplified Graph Convolution with Heterophily. In *NeurIPS*. 27184–27197.
- [4] Jiafeng Cheng, Qianqian Wang, Zhiqiang Tao, De-Yan Xie, and Quanxue Gao. 2020. Multi-View Attribute Graph Convolution Networks for Clustering. In *IJCAI*. 2973–2979.
- [5] Eli Chien, Jianhao Peng, Pan Li, and Olga Milenkovic. 2021. Adaptive Universal Generalized PageRank Graph Neural Network. In *ICLR*.
- [6] Chenhang Cui, Yazhou Ren, Jingyu Pu, Jiawei Li, Xiaorong Pu, Tianyi Wu, Yutao Shi, and Lifang He. 2024. A novel approach for effective multi-view clustering with information-theoretic perspective. In *NeurIPS*. 44847–44859.
- [7] Chenhang Cui, Yazhou Ren, Jingyu Pu, Xiaorong Pu, and Lifang He. 2023. Deep Multi-View Subspace Clustering with Anchor Graph. In *IJCAI*. 3577–3585.
- [8] Ganqu Cui, Jie Zhou, Cheng Yang, and Zhiyuan Liu. 2020. Adaptive Graph Encoder for Attributed Graph Embedding. In *KDD*. 976–985.
- [9] Shaohua Fan, Xiao Wang, Chuan Shi, Emiao Lu, Ken Lin, and Bai Wang. 2020. One2Multi Graph Autoencoder for Multi-view Graph Clustering. In *WWW*. 3070–3076.
- [10] Marco Federici, Anjan Dutta, Patrick Forré, Nate Kushman, and Zeynep Akata. 2020. Learning Robust Representations via Multi-View Information Bottleneck. In *ICLR*.
- [11] Claudio Gallicchio and Alessio Micheli. 2010. Graph echo state networks. In *IJCNN*. 1–8.
- [12] Jing Gao, Jiawei Han, Jialu Liu, and Chi Wang. 2013. Multi-View Clustering via Joint Nonnegative Matrix Factorization. In *SDM*. 252–260.
- [13] Marco Gori, Gabriele Monfardini, and Franco Scarselli. 2005. A new model for learning in graph domains. In *IJCNN*. 729–734.
- [14] Renxiang Guan, Zihao Li, Xianju Li, and Chang Tang. 2024. Pixel-superpixel contrastive learning and pseudo-label correction for hyperspectral image clustering. In *ICASSP*. 6795–6799.
- [15] Renxiang Guan, Zihao Li, Wenxuan Tu, Jun Wang, Yue Liu, Xianju Li, Chang Tang, and Ruyi Feng. 2024. Contrastive Multiview Subspace Clustering of Hyperspectral Images Based on Graph Convolutional Networks. *TGRS* 62 (2024), 1–14.
- [16] Kaveh Hassani and Amir Hosein Khas Ahmadi. 2020. Contrastive Multi-View Representation Learning on Graphs. In *ICML*. 4116–4126.
- [17] Dayu Hu, Zhibin Dong, Ke Liang, Hao Yu, Siwei Wang, and Xinwang Liu. 2024. High-order Topology for Deep Single-cell Multi-view Fuzzy Clustering. *IEEE Transactions on Fuzzy Systems* (2024).
- [18] Dayu Hu, Ke Liang, Zhibin Dong, Jun Wang, Yawei Zhao, and Kunlun He. 2024. Effective multi-modal clustering method via skip aggregation network for parallel scRNA-seq and scATAC-seq data. *Briefings in Bioinformatics* 25, 2 (2024), bbae102.
- [19] Zongmo Huang, Yazhou Ren, Xiaorong Pu, and Lifang He. 2021. Non-Linear Fusion for Self-Paced Multi-View Clustering. In *ACM MM*. 3211–3219.
- [20] Xiaodong Jia, Xiaoyuan Jing, Xiaoke Zhu, Ziyun Cai, and Chang-Hui Hu. 2021. Co-embedding: a semi-supervised multi-view representation learning approach. *Neural Computing and Applications* 34 (2021), 4437–4457.
- [21] Xiaodong Jia, Xiao-Yuan Jing, Xiaoke Zhu, Songcan Chen, Bo Du, Ziyun Cai, Zhenyu He, and Dong Yue. 2020. Semi-supervised multi-view deep discriminant representation learning. *TPAMI* 43, 7 (2020), 2496–2509.
- [22] Junlong Ke, Zichen Wen, Yechenao Yang, Chenhang Cui, Yazhou Ren, Xiaorong Pu, and Lifang He. 2024. Integrating Vision-Language Semantic Graphs in Multi-View Clustering. In *IJCAI*. 4273–4281.
- [23] Thomas N Kipf and Max Welling. 2016. Variational graph auto-encoders. *arXiv preprint arXiv:1611.07308* (2016).
- [24] Chung-Kuei Lee and Tyng-Luh Liu. 2016. Guided co-training for multi-view spectral clustering. In *ICIP*. 4042–4046.
- [25] Qimai Li, Xiao-Ming Wu, Han Liu, Xiaotong Zhang, and Zhichao Guan. 2019. Label efficient semi-supervised learning via graph filtering. In *CVPR*. 9582–9591.
- [26] Shouheng Li, Dongwoo Kim, and Qing Wang. 2022. Restructuring Graph for Higher Homophily via Learnable Spectral Clustering. *arXiv preprint arXiv:2206.02386* (2022).
- [27] Zhiping Lin and Zhao Kang. 2021. Graph Filter-based Multi-view Attributed Graph Clustering. In *IJCAI*. 2723–2729.
- [28] Yawen Ling, Jianpeng Chen, Yazhou Ren, Xiaorong Pu, Jie Xu, Xiaofeng Zhu, and Lifang He. 2023. Dual Label-Guided Graph Refinement for Multi-View Graph Clustering. In *AAAI*. 8791–8798.
- [29] Meng Liu, Zhengyang Wang, and Shuiwang Ji. 2022. Non-Local Graph Neural Networks. *TPAMI* 44, 12 (2022), 10270–10276.
- [30] Yue Liu, Wenxuan Tu, Sihang Zhou, Xinwang Liu, Linxuan Song, Xihong Yang, and En Zhu. 2022. Deep Graph Clustering via Dual Correlation Reduction. In *AAAI*. 7603–7611.
- [31] Yixin Liu, Yizhen Zheng, Daokun Zhang, Vincent C. S. Lee, and Shirui Pan. 2023. Beyond Smoothing: Unsupervised Graph Representation Learning with Edge Heterophily Discriminating. In *AAAI*. 4516–4524.
- [32] Sitao Luan, Chenqing Hua, Qincheng Lu, Jiaqi Zhu, Mingde Zhao, Shuyuan Zhang, Xiao-Wen Chang, and Doina Precup. 2022. Revisiting Heterophily For Graph Neural Networks. In *NeurIPS*. 1362–1375.
- [33] Nairouz Mrabah, Mohamed Bouguessa, Mohamed Fawzi Touati, and Riadh Ksantini. 2023. Rethinking Graph Auto-Encoder Models for Attributed Graph Clustering. *TKDE* 35, 9 (2023), 9037–9053.
- [34] Hoang Nt and Takanori Maehara. 2019. Revisiting graph neural networks: All we have is low-pass filters. *arXiv preprint arXiv:1905.09550* (2019).
- [35] Erlin Pan and Zhao Kang. 2021. Multi-view Contrastive Graph Clustering. In *NeurIPS*. 2148–2159.
- [36] Hongbin Pei, Bingzhe Wei, Kevin Chen-Chuan Chang, Yu Lei, and Bo Yang. 2020. Geom-GCN: Geometric Graph Convolutional Networks. In *ICLR*.
- [37] Xi Peng, Jiashi Feng, Shijie Xiao, Wei-Yun Yau, Joey Tianyi Zhou, and Songfan Yang. 2018. Structured AutoEncoders for Subspace Clustering. *TIP* 27, 10 (2018), 5076–5086.
- [38] Zhihao Peng, Hui Liu, Yuheng Jia, and Junhui Hou. 2021. Attention-driven graph clustering network. In *ACM MM*. 935–943.
- [39] Oleg Platonov, Denis Kuznetsov, Michael Diskin, Artem Babenko, and Liudmila Prokhorenkova. 2023. A critical look at the evaluation of GNNs under heterophily: Are we really making progress?. In *ICLR*.
- [40] Jingyu Pu, Chenhang Cui, Yazhou Ren, Zichen Wen, Tianyi Wu, Xiaorong Pu, and Lifang He. 2023. Deep Multi-View Clustering via View-Specific Representation and Global Graph. In *ACAIT*. 493–502.
- [41] Yazhou Ren, Xinyue Chen, Jie Xu, Jingyu Pu, Yonghao Huang, Xiaorong Pu, Ce Zhu, Xiaofeng Zhu, Zhifeng Hao, and Lifang He. 2024. A novel federated multi-view clustering method for unaligned and incomplete data fusion. *Information Fusion* 108 (2024), 102357.
- [42] Yazhou Ren, Jingyu Pu, Zhimeng Yang, Jie Xu, Guofeng Li, Xiaorong Pu, S Yu Philip, and Lifang He. 2024. Deep clustering: A comprehensive survey. *TNNLS* (2024).
- [43] Benedek Rozemberczki, Carl Allen, and Rik Sarkar. 2021. Multi-Scale attributed node embedding. *Journal of Complex Networks* 9, 2 (2021), cnab014.
- [44] Franco Scarselli, Marco Gori, Ah Chung Tsoi, Markus Hagenbuchner, and Gabriele Monfardini. 2008. The graph neural network model. *TNNLS* 20 (2008), 61–80.
- [45] Mengjing Sun, Pei Zhang, Siwei Wang, Sihang Zhou, Wenxuan Tu, Xinwang Liu, En Zhu, and Changjian Wang. 2021. Scalable multi-view subspace clustering with unified anchors. In *ACM MM*. 3528–3536.
- [46] Junpeng Tan, Yukai Shi, Zhijiang Yang, Caizhen Wen, and Liang Lin. 2021. Unsupervised Multi-View Clustering by Squeezing Hybrid Knowledge From Cross View and Each View. *TMM* 23 (2021), 2943–2956.
- [47] Wenxuan Tu, Renxiang Guan, Sihang Zhou, Chuan Ma, Xin Peng, Zhiping Cai, Zhe Liu, Jieren Cheng, and Xinwang Liu. 2024. Attribute-missing graph clustering network. In *AAAI*. 15392–15401.
- [48] Tim Van de Cruys, Thierry Poibeau, and Anna Korhonen. 2013. A tensor-based factorization model of semantic compositionality. In *NAACL*. 1142–1151.
- [49] Chun Wang, Shirui Pan, Ruiqi Hu, Guodong Long, Jing Jiang, and Chengqi Zhang. 2019. Attributed Graph Clustering: A Deep Attentional Embedding Approach. In *IJCAI*. 3670–3676.
- [50] Qianqian Wang, Zhengming Ding, Zhiqiang Tao, Quanxue Gao, and Yun Fu. 2021. Generative partial multi-view clustering with adaptive fusion and cycle consistency. *TIP* 30 (2021), 1771–1783.
- [51] Qianqian Wang, Zhiqiang Tao, Quanxue Gao, and Licheng Jiao. 2022. Multi-view subspace clustering via structured multi-pathway network. *TNNLS* 35, 5 (2022), 7244–7250.
- [52] Siwei Wang, Xinwang Liu, Xinzhou Zhu, Pei Zhang, Yi Zhang, Feng Gao, and En Zhu. 2022. Fast Parameter-Free Multi-View Subspace Clustering With Consensus Anchor Guidance. *TIP* 31 (2022), 556–568.
- [53] Zichen Wen, Yawen Ling, Yazhou Ren, Tianyi Wu, Jianpeng Chen, Xiaorong Pu, Zhifeng Hao, and Lifang He. 2024. Homophily-Related: Adaptive Hybrid Graph Filter for Multi-View Graph Clustering. In *AAAI*. 15841–15849.
- [54] Fei Wu, Xiao-Yuan Jing, Jun Zhou, Yimu Ji, Chao Lan, Qinghua Huang, and Ruchuan Wang. 2019. Semi-supervised multi-view individual and sharable feature learning for webpage classification. In *WWW*. 3349–3355.

- [55] Felix Wu, Amauri H. Souza Jr., Tianyi Zhang, Christopher Fifty, Tao Yu, and Kilian Q. Weinberger. 2019. Simplifying Graph Convolutional Networks. In *ICML*. 6861–6871.
- [56] Song Wu, Yan Zheng, Yazhou Ren, Jing He, Xiaorong Pu, Shudong Huang, Zhifeng Hao, and Lifang He. 2024. Self-Weighted Contrastive Fusion for Deep Multi-View Clustering. *TMM* (2024).
- [57] Wei Xia, Sen Wang, Ming Yang, Quanxue Gao, Jungong Han, and Xinbo Gao. 2022. Multi-view graph embedding clustering network: Joint self-supervision and block diagonal representation. *Neural Networks* 145 (2022), 1–9.
- [58] Teng Xiao, Zhengyu Chen, Zhimeng Guo, Zeyang Zhuang, and Suhang Wang. 2022. Decoupled Self-supervised Learning for Graphs. In *NeurIPS*. 620–634.
- [59] Chang Xu, Dacheng Tao, and Chao Xu. 2013. A survey on multi-view learning. *arXiv preprint arXiv:1304.5634* (2013).
- [60] Jie Xu, Yazhou Ren, Huayi Tang, Zhimeng Yang, Lili Pan, Yang Yang, Xiaorong Pu, S Yu Philip, and Lifang He. 2022. Self-supervised discriminative feature learning for deep multi-view clustering. *TKDE* 35, 7 (2022), 7470–7482.
- [61] Nan Xu, Yanqing Guo, Xin Zheng, Qianyu Wang, and Xiangyang Luo. 2018. Partial multi-view subspace clustering. In *ACM MM*. 1794–1801.
- [62] Yujun Yan, Milad Hashemi, Kevin Swersky, Yaoqing Yang, and Danai Koutra. 2022. Two Sides of the Same Coin: Heterophily and Oversmoothing in Graph Convolutional Neural Networks. In *ICDM*. 1287–1292.
- [63] Yan Yang and Hao Wang. 2018. Multi-view clustering: A survey. *Big data mining and analytics* 1, 2 (2018), 83–107.
- [64] Hanqing Zeng, Hongkuan Zhou, Ajitesh Srivastava, Rajgopal Kannan, and Viktor K. Prasanna. 2020. GraphSAINT: Graph Sampling Based Inductive Learning Method. In *ICLR*.
- [65] Chen Zhang, Siwei Wang, Jiyuan Liu, Sihang Zhou, Pei Zhang, Xinwang Liu, En Zhu, and Changwang Zhang. 2021. Multi-view Clustering via Deep Matrix Factorization and Partition Alignment. In *ACM MM*. 4156–4164.
- [66] Handong Zhao, Zhengming Ding, and Yun Fu. 2017. Multi-view clustering via deep matrix factorization. In *AAAI*. 2921–2927.
- [67] Jing Zhao, Xijiong Xie, Xin Xu, and Shiliang Sun. 2017. Multi-view learning overview: Recent progress and new challenges. *Information Fusion* 38 (2017), 43–54.
- [68] Shuai Zheng, Xiao Cai, Chris Ding, Feiping Nie, and Heng Huang. 2015. A closed form solution to multi-view low-rank regression. In *AAAI*. 1973–1979.
- [69] Xin Zheng, Yixin Liu, Shirui Pan, Miao Zhang, Di Jin, and Philip S Yu. 2022. Graph neural networks for graphs with heterophily: A survey. *arXiv preprint arXiv:2202.07082* (2022).
- [70] Dengyong Zhou, Olivier Bousquet, Thomas Lal, Jason Weston, and Bernhard Schölkopf. 2003. Learning with local and global consistency. In *NeurIPS*. 321–328.
- [71] Peng Zhou and Liang Du. 2023. Learnable graph filter for multi-view clustering. In *ACM MM*. 3089–3098.
- [72] Yiyang Zhou, Qinghai Zheng, Wenbiao Yan, Yifei Wang, and Jihua Zhu. 2023. MCoCo: Multi-level Consistency Collaborative Multi-view Clustering. *arXiv preprint arXiv:2302.13339* (2023).
- [73] Jiong Zhu, Yujun Yan, Lingxiao Zhao, Mark Heimann, Leman Akoglu, and Danai Koutra. 2020. Beyond homophily in graph neural networks: Current limitations and effective designs. In *NeurIPS*. 7793–7804.

# Appendix

MM '24, October 28-November 1, 2024, Melbourne, VIC, Australia

## A The Proof of Theorem 1 [10]

In this section, we introduce several formulas about mutual information that are used in this work.

**Table 1: Notions for Theorem 1.**

| Symbol              | Meaning                                                         |
|---------------------|-----------------------------------------------------------------|
| $x_i$               | The original feature of node $i$ .                              |
| $\bullet y_i$       | Data that belong to the same class of node $i$ .                |
| $\bullet \bar{y}_i$ | Data that not belong to the same class of node $i$ .            |
| $\tilde{X}$         | Nodes features with random mask.                                |
| $\bar{x}_i$         | The features of node $i$ recovered from the $\tilde{X}_{y_i}$ . |
| $h_i$               | The features of node $i$ aggregated from the $X_{y_i}$ .        |
| $y_i$               | The label of node $i$ .                                         |
| AGG                 | Aggregation operation of GCN.                                   |

(P1) Positivity:

$$I(x; y) \geq 0, I(x; y|z) \geq 0$$

(P2) Chain rule:

$$I(xy; z) = I(y; z) + I(x; z|y)$$

(P3) Chain rule (Multivariate Mutual Information):

$$I(x; y; z) = I(y; z) - I(y; z|x)$$

**Theorem A.1.** Let  $\tilde{X}_{y_i}$  and  $\tilde{X}_{\bar{y}_i}$  be random variables with joint distribution  $p(\tilde{X}_{y_i}, \tilde{X}_{\bar{y}_i}, x_i)$ . Let  $\bar{x}_i$  be the aggregation of  $\tilde{X}_{y_i}$ , then:

$$I(\tilde{X}_{y_i}, x_i|\bar{x}_i) \leq I(\tilde{X}_{y_i}, \tilde{X}_{\bar{y}_i}|\bar{x}_i) + I(\tilde{X}_{y_i}, x_i|\tilde{X}_{\bar{y}_i}).$$

**Hypothesis (H1):**  $\bar{x}_i$  be the aggregation of  $\tilde{X}_{y_i}$ :

$$I(x_i, \bar{x}_i|\tilde{X}_{y_i}, \tilde{X}_{\bar{y}_i}) = 0.$$

PROOF.

$$\begin{aligned}
 I(\tilde{X}_{y_i}; x_i|\bar{x}_i) &\stackrel{(P3)}{=} I(\tilde{X}_{y_i}; x_i|\bar{x}_i, \tilde{X}_{\bar{y}_i}) + I(\tilde{X}_{y_i}; \tilde{X}_{\bar{y}_i}; x_i|\bar{x}_i) \\
 &\stackrel{(P3)}{=} I(\tilde{X}_{y_i}; x_i|\tilde{X}_{\bar{y}_i}) - I(\tilde{X}_{y_i}; x_i; \bar{x}_i|\tilde{X}_{\bar{y}_i}) \\
 &\quad + I(\tilde{X}_{y_i}; \tilde{X}_{\bar{y}_i}; x_i|\bar{x}_i) \\
 &\stackrel{(P3)}{=} I(\tilde{X}_{y_i}; x_i|\tilde{X}_{\bar{y}_i}) - I(x_i; \bar{x}_i|\tilde{X}_{\bar{y}_i}) + I(x_i; \bar{x}_i|\tilde{X}_{\bar{y}_i}, \tilde{X}_{y_i}) \\
 &\quad + I(x_i; \tilde{X}_{\bar{y}_i}; x_i|\bar{x}_i) \\
 &\stackrel{(P1)}{\leq} I(\tilde{X}_{y_i}; x_i|\tilde{X}_{\bar{y}_i}) + I(x_i; \bar{x}_i|\tilde{X}_{\bar{y}_i}, \tilde{X}_{y_i}) + I(\tilde{X}_{y_i}; \tilde{X}_{\bar{y}_i}; y|\bar{x}_i) \\
 &\stackrel{(H1)}{=} I(\tilde{X}_{y_i}; x_i|\tilde{X}_{\bar{y}_i}) + I(\tilde{X}_{y_i}; \tilde{X}_{\bar{y}_i}; x_i|\bar{x}_i) \\
 &\stackrel{(P3)}{=} I(\tilde{X}_{y_i}; x_i|\tilde{X}_{\bar{y}_i}) + I(\tilde{X}_{y_i}; \tilde{X}_{\bar{y}_i}|\bar{x}_i) - I(\tilde{X}_{y_i}; \tilde{X}_{\bar{y}_i}|\bar{x}_i, x_i) \\
 &\stackrel{(P1)}{\leq} I(\tilde{X}_{y_i}; x_i|\tilde{X}_{\bar{y}_i}) + I(\tilde{X}_{y_i}; \tilde{X}_{\bar{y}_i}|\bar{x}_i)
 \end{aligned}$$

□

**Theorem A.2.** Let  $\tilde{X}_{y_i}$  and  $\tilde{X}_{\bar{y}_i}$  be random variables with joint distribution  $p(\tilde{X}_{y_i}, \tilde{X}_{\bar{y}_i}, x_i)$ . Let  $\bar{x}_i$  be the aggregation of  $\tilde{X}_{y_i}$ , then:

$$I(x_i; \bar{x}_i) \geq I(x_i; \tilde{X}_{y_i}, \tilde{X}_{\bar{y}_i}) - I(\tilde{X}_{y_i}, \tilde{X}_{\bar{y}_i}|\bar{x}_i) - I(\tilde{X}_{y_i}; x_i|\tilde{X}_{\bar{y}_i}) - I(\tilde{X}_{\bar{y}_i}; y|\tilde{X}_{y_i}).$$

**Hypothesis (H1):**  $\bar{x}_i$  be the aggregation of  $\tilde{X}_{y_i}$ :

$$I(x_i, \bar{x}_i|\tilde{X}_{y_i}, \tilde{X}_{\bar{y}_i}) = 0.$$

PROOF.

$$\begin{aligned}
 I(x_i; \bar{x}_i) &\stackrel{(P3)}{=} I(x_i; \bar{x}_i|\tilde{X}_{y_i}, \tilde{X}_{\bar{y}_i}) + I(x_i; \tilde{X}_{y_i}, \tilde{X}_{\bar{y}_i}; \bar{x}_i) \\
 &\stackrel{(H1)}{=} I(x_i; \tilde{X}_{y_i}, \tilde{X}_{\bar{y}_i}; \bar{x}_i) \\
 &\stackrel{(P3)}{=} I(x_i; \tilde{X}_{y_i}, \tilde{X}_{\bar{y}_i}) - I(x_i; \tilde{X}_{y_i}, \tilde{X}_{\bar{y}_i}|\bar{x}_i) \\
 &\stackrel{(P2)}{=} I(x_i; \tilde{X}_{y_i}, \tilde{X}_{\bar{y}_i}) - I(x_i; \tilde{X}_{y_i}|\bar{x}_i) - I(x_i; \tilde{X}_{\bar{y}_i}|\bar{x}_i, \tilde{X}_{y_i}) \\
 &\stackrel{(P3)}{=} I(x_i; \tilde{X}_{y_i}, \tilde{X}_{\bar{y}_i}) - I(x_i; \tilde{X}_{\bar{y}_i}|\bar{x}_i) - I(x_i; \tilde{X}_{y_i}|\tilde{X}_{\bar{y}_i}) \\
 &\quad + I(x_i; \tilde{X}_{\bar{y}_i}; \bar{x}_i|\tilde{X}_{y_i}) \\
 &\stackrel{(P3)}{=} I(x_i; \tilde{X}_{y_i}, \tilde{X}_{\bar{y}_i}) - I(x_i; \tilde{X}_{y_i}|\bar{x}_i) - I(x_i; \tilde{X}_{\bar{y}_i}|\tilde{X}_{y_i}) \\
 &\quad + I(x_i; \bar{x}_i|\tilde{X}_{\bar{y}_i}) - I(x_i; \bar{x}_i|\tilde{X}_{\bar{y}_i}, \tilde{X}_{y_i}) \\
 &\stackrel{(H1)}{=} I(x_i; \tilde{X}_{y_i}, \tilde{X}_{\bar{y}_i}) - I(x_i; \tilde{X}_{y_i}|\bar{x}_i) - I(x_i; \tilde{X}_{\bar{y}_i}|\tilde{X}_{y_i}) \\
 &\quad + I(x_i; \bar{x}_i|\tilde{X}_{\bar{y}_i}) \\
 &\stackrel{(P1)}{\geq} I(x_i; \tilde{X}_{y_i}, \tilde{X}_{\bar{y}_i}) - I(x_i; \tilde{X}_{y_i}|\bar{x}_i) - I(x_i; \tilde{X}_{\bar{y}_i}|x_i) \\
 &\stackrel{(Th.A.1)}{\geq} I(x_i; \tilde{X}_{y_i}, \tilde{X}_{\bar{y}_i}) - I(\tilde{X}_{y_i}; x_i|\tilde{X}_{\bar{y}_i}) - I(\tilde{X}_{y_i}; \tilde{X}_{\bar{y}_i}|\bar{x}_i) \\
 &\quad - I(x_i; \tilde{X}_{\bar{y}_i}|\tilde{X}_{y_i})
 \end{aligned}$$

□

**Theorem A.3.** Let  $\tilde{X}_{y_i}$  and  $\tilde{X}_{\bar{y}_i}$  be mutually redundant for  $x_i$ . Let  $\bar{x}_i$  be the aggregation of  $\tilde{X}_{y_i}$  that is sufficient for  $\tilde{X}_{\bar{y}_i}$ , and let  $\bar{\bar{x}}_i$  be the aggregation of  $\tilde{X}_{\bar{y}_i}$  then:

$$I(x_i; \bar{x}_i) = I(\tilde{X}_{y_i}, \tilde{X}_{\bar{y}_i}; x_i).$$

**Hypotheses (H1):**  $\bar{x}_i$  and  $\bar{\bar{x}}_i$  are mutually redundant for  $x_i$ :

$$I(x_i; \tilde{X}_{y_i}|\tilde{X}_{\bar{y}_i}) + I(x_i; \tilde{X}_{\bar{y}_i}|\tilde{X}_{y_i}) = 0.$$

**Hypotheses (H2):**  $\bar{x}_i$  is sufficient for  $\tilde{X}_{\bar{y}_i}$ :

$$I(\tilde{X}_{\bar{y}_i}; \tilde{X}_{y_i}|\bar{x}_i) = 0.$$

PROOF.

$$\begin{aligned}
 I(x_i; \bar{x}_i) &\stackrel{(Th.A.2)}{\geq} I(x_i; \tilde{X}_{y_i}, \tilde{X}_{\bar{y}_i}) - I(\tilde{X}_{y_i}; x_i|\tilde{X}_{\bar{y}_i}) - I(\tilde{X}_{y_i}; \tilde{X}_{\bar{y}_i}|\bar{x}_i) \\
 &\quad - I(x_i; \tilde{X}_{\bar{y}_i}|\tilde{X}_{y_i}) \\
 &\stackrel{(H1)}{=} I(x_i; \tilde{X}_{y_i}, \tilde{X}_{\bar{y}_i}) - I(\tilde{X}_{y_i}; \tilde{X}_{\bar{y}_i}|\bar{x}_i) \\
 &\stackrel{(H2)}{=} I(x_i; \tilde{X}_{y_i}, \tilde{X}_{\bar{y}_i})
 \end{aligned}$$

□

Since  $I(x_i; \bar{x}_i) \leq I(\tilde{X}_{y_i}, \tilde{X}_{\bar{y}_i}; x_i)$  is a consequence of the data processing inequality, we conclude that:

$$I(x_i; \bar{x}_i) = I(\tilde{X}_{y_i}, \tilde{X}_{\bar{y}_i}; x_i).$$

**Table 2: The clustering results on the other three real-world datasets. The best results are shown in bold, and the second-best results are underlined. All experimental results were averaged after performing the experiment five times.**

| Method/Datasets | EAT (HR 0.40 & 0.40) |             |             |             | Texas (HR 0.09 & 0.09) |             |             |             | IMDB (HR 0.48 & 0.62 & 0.40) |             |             |             |
|-----------------|----------------------|-------------|-------------|-------------|------------------------|-------------|-------------|-------------|------------------------------|-------------|-------------|-------------|
|                 | NMI%                 | ARI%        | ACC%        | F1%         | NMI%                   | ARI%        | ACC%        | F1%         | NMI%                         | ARI%        | ACC%        | F1%         |
| VGAE (2016)     | <u>30.8</u>          | 22.1        | 45.0        | 41.1        | 12.7                   | 21.7        | 55.3        | 29.5        | 0.4                          | 0.9         | 44.2        | 35.7        |
| DAEGC (2019)    | 4.6                  | 3.4         | 33.1        | 31.9        | 6.4                    | 2.6         | 31.7        | 25.0        | 0.6                          | 1.0         | 37.9        | 35.3        |
| AGE (2020)      | 29.6                 | <b>25.1</b> | 47.6        | <u>47.6</u> | 7.5                    | 7.3         | 36.6        | 36.6        | 4.4                          | 4.6         | 43.2        | 42.2        |
| O2MAC (2020)    | <b>33.1</b>          | <u>24.2</u> | 45.9        | 43.4        | 8.7                    | 14.6        | 46.7        | 29.1        | 0.3                          | 0.2         | 40.2        | 35.4        |
| MvAGC (2020)    | 1.9                  | 0.8         | 30.2        | 26.6        | 5.4                    | 1.1         | 54.3        | 19.8        | 1.3                          | -1.8        | 48.5        | 28.2        |
| AGCN (2021)     | 9.7                  | 3.8         | 35.6        | 28.3        | 15.4                   | 18.1        | <u>61.8</u> | 43.0        | 0.3                          | 1.4         | 54.5        | 31.1        |
| MCGC (2021)     | 30.5                 | 23.0        | <u>47.9</u> | 45.4        | 12.7                   | 12.9        | 51.9        | 32.5        | 5.2                          | 10.3        | <b>58.3</b> | 38.8        |
| DCRN (2022a)    | 10.7                 | 15.1        | 55.2        | 27.6        | 10.7                   | 15.1        | 55.2        | 27.6        | 0.2                          | 0.1         | 53.4        | 25.5        |
| DuaLGR (2023)   | 24.6                 | 19.4        | 44.0        | 40.4        | <u>32.6</u>            | <u>26.0</u> | 54.3        | <u>46.4</u> | <u>6.2</u>                   | <u>12.5</u> | 52.0        | <u>44.7</u> |
| DOAGC (ours)    | 27.1                 | 22.4        | <b>53.6</b> | <b>51.9</b> | <b>47.3</b>            | <b>47.9</b> | <b>74.3</b> | <b>46.5</b> | <b>8.9</b>                   | <b>16.9</b> | <u>56.7</u> | <b>47.3</b> |

## B Supplementary Experiments

As shown in Table 2, we also perform comparative experiments on three other popular graph datasets. **EAT** represents Europe Air-Traffic, a dataset documenting European air traffic [33]. Similar to Wisconsin and Cornell presented in Table 1 of the main text, **Texas** is a webpage graph from WebKB. **IMDB** [9] is a movie network that originates from the IMDB dataset, including graphs of both co-actors and co-directors. DOAGC achieved promising performance on all three datasets. Particularly, for the heterophilous graph Texas, we observed significant improvements in ACC by 12.5%, NMI by 14.7%, and ARI by 21.9%. For EAT and IMDB datasets, our proposed method also further improves the optimal values of certain evaluation metrics. In addition, we conducted supplementary convergence analysis experiments on the six synthetic ACM graph datasets [28] with varying degrees of homophily. As shown in Figure 1, the six synthetic ACM datasets stem from the original ACM dataset and share comparable training configurations, leading to almost overlapping convergence curves. Additionally, with a sizable decline in the loss value, they rapidly reach the convergence state during the initial training phase and gradually stabilize.

**Table 3: The homophily ratio of reconstruction graphs.**

| Datasets  | Graphs          | $A^v$  | $S^v$             | $\hat{A}^v$       |
|-----------|-----------------|--------|-------------------|-------------------|
| Texas     | $\mathcal{G}^1$ | 0.0871 | 0.5389 $\uparrow$ | 0.5436 $\uparrow$ |
|           | $\mathcal{G}^2$ | 0.0871 | 0.5699 $\uparrow$ | 0.5735 $\uparrow$ |
| Wisconsin | $\mathcal{G}^1$ | 0.1921 | 0.6096 $\uparrow$ | 0.5920 $\uparrow$ |
|           | $\mathcal{G}^2$ | 0.1921 | 0.5965 $\uparrow$ | 0.5895 $\uparrow$ |
| Cornell   | $\mathcal{G}^1$ | 0.2998 | 0.5323 $\uparrow$ | 0.5762 $\uparrow$ |
|           | $\mathcal{G}^2$ | 0.2998 | 0.5664 $\uparrow$ | 0.5784 $\uparrow$ |
| ACM00     | $\mathcal{G}^1$ | 0.0000 | 0.4489 $\uparrow$ | 0.4517 $\uparrow$ |
|           | $\mathcal{G}^2$ | 0.0000 | 0.4450 $\uparrow$ | 0.3712 $\uparrow$ |
| ACM01     | $\mathcal{G}^1$ | 0.1000 | 0.4500 $\uparrow$ | 0.4531 $\uparrow$ |
|           | $\mathcal{G}^2$ | 0.1000 | 0.4400 $\uparrow$ | 0.3758 $\uparrow$ |
| ACM02     | $\mathcal{G}^1$ | 0.2000 | 0.4525 $\uparrow$ | 0.4536 $\uparrow$ |
|           | $\mathcal{G}^2$ | 0.2000 | 0.4379 $\uparrow$ | 0.3888 $\uparrow$ |

In addition to conducting supplementary comparison and convergence analysis experiments, we conducted evaluation experiments on diverse metrics pertaining to the graphs. Specifically, we perform experiments on datasets with a low homophily ratio of the original adjacency matrix  $A^v$ , attempting to evaluate the homophily ratios of the node correlation matrix  $S^v$  and the reconstruction graph  $\hat{A}^v$ . As can be seen in Table 3, both the node correlation matrix  $S^v$  and the adaptive reconstruction graph  $\hat{A}^v$  show a significant improvement in the homophily ratio compared to the original adjacency matrix  $A^v$ . Furthermore, the incorporation of original structural information in reconstruction graph  $\hat{A}^v$  does not lead to a notable reduction in the homophily ratio, thus indirectly affirming the efficiency and practicality of our adaptive mechanism.

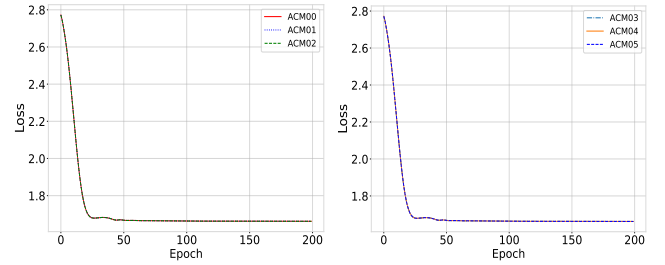**Figure 1: Supplementary convergence analysis.**
